# Supplementary material
Source: Elsevier journal article supplement (https://www.sciencedirect.com/science/article/pii/S0211563818300646)
Supplement: mmc1 [file S0211563818300646:mmc1.docx]

Tabla II. Características de los estudios incluidos

| **Autor**  **año.País** | **Nº Partici-**  **Pantes (hombres)** | **Edad**  **Media** | **Descripción ACV**  **Isquémicos/Hemorrágicos** | **Estadio**  **ACV** | **Variables evaluadas** | **Resultados** | **Calidad**  **Artículos** |
| --- | --- | --- | --- | --- | --- | --- | --- |
| Kelly S Chu et al.32  2004. Canada | 12(11) | GE:61,9  GC:63,4 | 8/4 | Crónicos | Función cardiorrespiratoria  Fuerza muscular  Marcha  Equilibrio | Mejora significativa pre-post GE. No GC.  Diferencia significativa entre grupos | 6/10 |
| Aidar FJ et al.33 2007.Brasil | 28(19) | GE:50,3  GC:52,5 | 28/0 | Crónicos | Calidad de vida | Mejora significativa pre-post GE; sin cambios en GC. Diferencia significativa entre grupos. | 5/10 |
| Noh DK et al.34 2008Corea | 25(11) | GE:61,9  GC:63,4 | 13/12 | Crónicos | Equilibrio | Mejora significativa pre-post GE; sin cambios en GC. Diferencia significativa entre grupos. | 5/10 |
| Dongjin Lee et al.35 2010. Corea | 34(16) | GE:62,06  GC:61,41 | 17/17 | Crónicos | Equilibrio | Mejora significativa pre-post en equilibrio estático y dinámico en GE. Mejora significativa 3 variables de equilibrio estático en GC.  Diferencia significativa entre grupos. | 7/10 |
| Tripp et al.36 2014  Alemania | 30(19) | GE:64,8  GC:65,0 | 27/3 | Subagudos (2semanas después ACV) | Equilibrio | Mejora significativa pre-post en todas las variables en GE y GC.  Diferencia significativa entre grupos. | 7/10 |
| Jaehyun Jung et al.37 2014. Corea | 30(15) | GE:57,2  GC:55,6 | 10/20 | Crónicos | Equilibrio | Mejora significativa pre-post en GE y GC.  Diferencia significativa entre grupos | 6/10 |
| Kim EK et al.38 2015Corea | 20(10) | GE:69,1  GC:68,0 | - | Crónicos | Equilibrio  Funcionalidad | Mejora significativa pre-post en GE y GC.  Diferencia significativa entre grupos. | 5/10 |
| Zhu Z et al.39 2016  China | 28(22) | GE:56,6  GC:57,1 | 21/7 | Crónicos | Equilibrio  Marcha | Mejora significativa pre-post en GE y GC.  Diferencia significativa entre grupos. | 7/10 |
| Kim EK et al.40 2016  Corea | 20(10) | GE:69,1  GC:68,0 | - | Crónicos | Equilibrio  Marcha | Mejora significativa pre-post en GE. No diferencias en GC.  Diferencias significativa en todas las variables entre grupos. | 6/10 |
| Zhang Y et al.41 2016  China | 36(19) | GE:56,3  GC:54,7 | 25/11 | Subagudos | Fuerza  Función muscular  Tono muscular  Equilibrio Funcionalidad | Mejora significativa fuerza de flexión y extensión de rodilla y dorsiflexión y flexión plantar en GE. Mejora significativa en flexión de rodilla y dorsiflexión en GC.  El GE mejora más que el grupo control significativamente en función muscular.  No diferencias pre-post ni entre grupos en tono muscular.  Mejoras significativas en equilibrio y funcionalidad pre-post en GE y GC. Mejoras mayores en GE. | 8/10 |
| Byoung-Sun Park et al.42 2016.Corea | 28(20) | GE:50,5  GC:37,9 | 19/9 | Agudos | Marcha | Mejora significativa pre-post en todos los parámetros en GE y GC. Diferencias significativas entre grupos. | 7/10 |
| [Kelvin Chan](http://www.tandfonline.com/author/Chan%2C+Kelvin) et al.43 2017. Canadá | 25(13) | GE:66,0  GC:64,0 | 25/0 | Subagudos | Equilibrio  Marcha | Mejora significativa pre-post en GE y GC.  Mejora clínicamente significativa entre grupos en equilibrio | 7/10 |
| [Han EY](https://www.ncbi.nlm.nih.gov/pubmed/?term=Han%20EY%5BAuthor%5D&cauthor=true&cauthor_uid=28306685) et al.44 2017  Corea | 20(12) | GE:59,40  GC:62,40 | 14/6 | Subagudos | Marcha  Función cardiorrespiratoria  Funcionalidad | Mejora significativa pre-post en GE en marcha. No diferencias entre grupos.  Mejora significativa pre-post en GE en función cardiorrespiratoria. Diferencia significativa entre grupos.  Mejora significativa pre-post GE y GC en funcionalidad. No diferencia entre grupos. | 7/10 |

GE: Grupo experimental; GC: Grupo control; ACV: Accidente cerebrovascular

Tabla III. Características de las intervenciones

| **Autor**  **año.País** | **Profesional que lleva a cabo la intervención/experiencia** | **Descripción de la Intervención del grupo experimental** | **Descripción de la intervención del grupo control** | **Duración de la Intervención**  **(semanas)** | **Nº Sesiones**  **Duración (min)**  **Sesiones/semana** |
| --- | --- | --- | --- | --- | --- |
| Kelly S Chu et al.32  2004. Canada | Las sesiones del grupo experimental fueron supervisadas por un fisioterapeuta y dos expertos en fisiología del ejercicio. | Programa de ejercicios en agua centrado en ejercicios de mmii para mejorar la resistencia cardiovascular | Programa de ejercicios de miembro superior con el objetivo de mejorar la función de la extremidad superior | 8 | 24  60  3 |
| Aidar FJ et al.33 2007.Brasil | - | Calentamiento en seco (caminar) + Actividad física en agua (caminar, desplazamientos variados, ejercicios con aparatos y nadar) | Ninguna actividad física. Realizó el mismo programa cuatro meses después | 12 | 24  45/60  2 |
| Noh DK et al.34 2008Corea | Dos terapeutas entrenados en los métodos Halliwick y Ai Chi realizaron el programa por turnos | Terapia Acuática basada en métodos Ai Chi y Halliwick. Centrándose en ejercicios de equilibrio y soporte de peso | Terapia convencional basada en ejercicios | 8 | 24  60  3 |
| Dongjin Lee et al.35 2010. Corea | - | 10 tareas en piscina que incluían ejercicios de calentamiento general, estiramiento, resistencia, fuerza muscular, equilibrio, coordinación y vuelta a la calma | 10 tareas en seco de la misma manera que el grupo experimental | 12 | 36  50  3 |
| Tripp et al.36 2014  Alemania | Las sesiones de Halliwick fueron llevadas a cabo por fisioterapeutas formados en este método | Terapia acuática (Terapia Halliwick) +Tratº fisioterápico convencional | Tratº fisioterápico convencional | 2 | GE:45min terapia acuática 3 veces/sem + Tratº Fisioterapia conven. 2 veces/sem.  GC:TratºFisioterapiaconven.5veces/sem.  Cada grupo recibió 10 sesiones. |
| Jaehyun Jung et al.37 2014. Corea | - | Ejercicios en piscina de subida y bajada de obstáculo utilizando IGYM System (5 min calentamiento, 30 min entrenamiento y 5 min vuelta a la calma) | En seco igual ejercicios que en agua | 12 | 36  40  3 |
| Kim EK et al.38 2015Corea | - | FNP mmii en agua. Utilizando el método de iniciación rítmica, después de realizar estiramiento | FNP mmii en seco. Utilizando el método de iniciación rítmica, después de realizar estiramiento | 6 | 30  30  5 |
| Zhu Z et al.39 2016  China | Un fisioterapeuta llevo a cabo las intervenciones de forma individualizada con cada paciente | En agua: 5 min Calentamiento (estiramientos), 30 min entrenamiento (15 repeticiones de: fortalecimiento mmii, ejercicios de equilibrio/coordinación, cinta rodante) 10 min vuelta a la calma (estiramientos, respiración profunda y flotar en agua) | En seco.- 5 min Calentamiento (estiramientos), 30 min entrenamiento 15 repeticiones de (fortalecimiento mmii, ejercicios de movilidad de tronco, cinta rodante), 10min vuelta a la calma (estiramientos) | 4 | 20  45  5 |
| Kim EK et al.40 2016  Corea | - | Técnicas de neurodesarrollo + Tareal dual acuática: | Técnicas de neurodesarrollo | 6 | 30  30  5 |
| Zhang Y et al.41 2016  China | Dos fisioterapeutas entrenados llevaron a cabo el protocolo | 5min calentamiento y 35 min ejercicios acuáticos de mmii y tapiz rodante bajo agua incluyendo 5 min Halliwick. | Fisioterapia estándar en seco, 5 min calentamiento y 35 min ejercicios de mmii, subida-bajada de escaleras, bicicleta, tapiz rodante y pelota suiza en seco | 8 | 40  40  5 |
| Byoung-Sun Park et al.42 2016.Corea | Fisioterapeutas certificados en el método Halliwick y Watsu | Ejercicio en agua. Calentamiento, rotaciones con control de tronco. + Ejercicios de tronco específicos (trabajo abdominal y pélvico). + Enfriamiento, rotaciones con control de tronco, técnicas de relajación muscular (Watsu) y estiramiento | Ejercicios en seco de tronco (puente, abdominales y en cuadrupedia) | 4 | 12  30  3 |
| [Kelvin Chan](http://www.tandfonline.com/author/Chan%2C+Kelvin) et al.43 2017. Canadá | Fisioterapeutas | Ejercicios acuáticos: ejercicios de equilibrio, estiramiento, fortalecimiento y entrenamiento de resistencia. +Ejercicios en seco: entrenamiento de transferencias, ejercicios de equilibrio, estiramiento, fortalecimiento y entrenamiento de resistencia, reeducación de marcha y escaleras | Ejercicios en seco: entrenamiento de transferencias, ejercicios de equilibrio, estiramiento, fortalecimiento y entrenamiento de resistencia, reeducación de marcha y escaleras | 6 | 12  60  2 |
| [Han EY](https://www.ncbi.nlm.nih.gov/pubmed/?term=Han%20EY%5BAuthor%5D&cauthor=true&cauthor_uid=28306685) et al.44 2017  Corea | Las sesiones fueron llevadas a cabo y supervisadas por  terapeutas y terapeutas ocupacionales certificados | Rehabilitación convencional (fisioterapia+terapia ocupacional)+Ejercicio aeróbico en cinta rodante subacuática | Rehabilitación convencional (fisioterapia+terapia ocupacional) + Ejercicio aeróbico en seco | 6 | 5  30  5 |

GE: Grupo experimental; GC: Grupo control; FNP: Facilitación Neuromuscular Propioceptiva; IGYM System: Se compone de una torre redonda, barra y un anillo, hecho de plástico. El sistema IGYM flota en el agua, por lo que añade un peso a la parte superior redonda para hacer que se hunda en el agua.
